# Supplementary material for: Mutations in RHOT1 Disrupt Endoplasmic Reticulum–Mitochondria Contact Sites Interfering with Calcium Homeostasis and Mitochondrial Dynamics in Parkinson's Disease
Source: PubMed Central journal article supplement (PMC6798875; doi:10.1089/ars.2018.7718), 2019-10-17
Supplement: Supp_Fig1.pdf [file Supp_Fig1.pdf]

## Supplementary Data

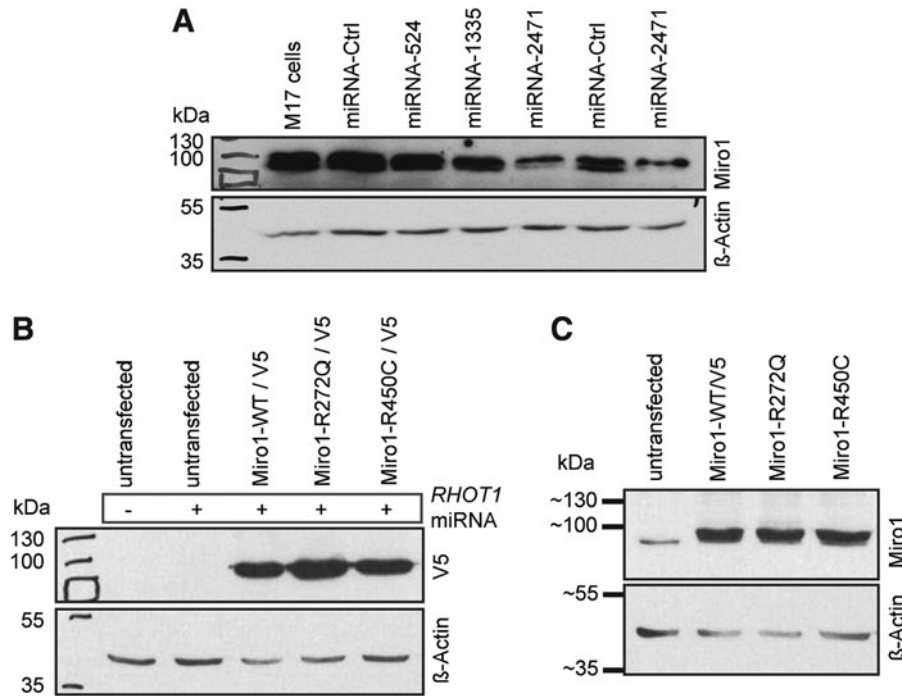

**SUPPLEMENTARY FIG. S1. Characterization of knockdown of endogenous *RHOT1* and overexpression of *RHOT1* in M17 cells.** (A) A stable knockdown of endogenous *RHOT1* was established in M17 cells by transfection with miRNAs targeting different regions of *RHOT1* and subsequent selection of positively transfected cells with 6  $\mu\text{g}/\text{mL}$  blasticidin. Knockdown of *RHOT1* was most efficient by using the miRNA-2471, which is targeting the 5'UTR of *RHOT1*. Therefore, we chose the miRNA-2471 for all further experiments. (B) Representative Western blot image of untransfected M17 cells or M17 expressing different variants of Miro1 in the pcDNA3.1/V5-HisA vector: WT Miro1 (Miro1-WT/V5), Miro1-R272Q, and Miro1-R450C. Western blot was probed using an antibody against the V5 tag (R960-25; Sigma-Aldrich). Untransfected cells show no signal for V5. (C) Representative Western blot image of untransfected M17 cells or M17 expressing different variants of Miro1. Western blot was probed with an antibody against Miro1 (HPA010687; Sigma-Aldrich). Untransfected M17 cells show a band for endogenous Miro1, whereas M17 cells transfected with the pcDNA3.1/V5-HisA vector containing *RHOT1* variants show a strong band for overexpressed Miro1 protein. miRNA, microRNA; UTR, untranslated region; WT, wild type.
