# Supplementary material for: Mutations in RHOT1 Disrupt Endoplasmic Reticulum–Mitochondria Contact Sites Interfering with Calcium Homeostasis and Mitochondrial Dynamics in Parkinson's Disease
Source: PubMed Central journal article supplement (PMC6798875; doi:10.1089/ars.2018.7718), 2019-10-17
Supplement: Supp_Table1.pdf [file Supp_Table1.pdf]

SUPPLEMENTARY TABLE S1. LIST OF PRIMERS USED FOR THE RHOT1 MUTATION SCREEN IN PARKINSON'S DISEASE PATIENTS

| Exon | Exon length (bp) | PCR product (bp) | primer forward (5' > 3')              | primer reverse (5' > 3')                  | Tm   |
|------|------------------|------------------|---------------------------------------|-------------------------------------------|------|
| 2    | 59               | 212              | TTG CCA AAT TTG<br>AGC TTA TG         | ACA CAT GCC AAA<br>AGA GAC AG             | 56°C |
| 3    | 82               | 230              | TTG AGT GAT AAT ATT<br>CAA AGG TGT TT | CCT CTC TGA ACA<br>TTT GTA AAA GC         | 54°C |
| 4    | 44               | 117              | CAA TAT GAA ACA TTG<br>ACT TCC TGT C  | TTC TAC ACA AAA<br>CCC CAC ACC            | 61°C |
| 5    | 54               | 163              | TTG CTA ATT AAG TGC<br>TGT CTA TG     | CCA CTG AAA CCA<br>ACT ATA GGG            | 59°C |
| 6    | 53               | 187              | GGC TAA GCG CTT<br>GTT AAT TTT C      | AAA TTT AAG TGA<br>AGG ATT TAG GGA AG     | 57°C |
| 7    | 109              | 168              | CCT TAT TAC AAT GTG<br>CCC TG         | AAA TTT TCA AAT CAA<br>ATT ACA AGG        | 59°C |
| 8    | 102              | 378              | CAT GTT GTG ATG<br>TCC ACA AAG        | ACC AAA ATG TAA<br>CCA TTT AAT AAG C      | 60°C |
| 9    | 99               | 185              | CAT TGC TTA TGA AAA<br>TCA CAG        | ACG CAA ATG TCT<br>GAA ATA AAG            | 54°C |
| 10   | 109              | 235              | GTG GTT TTA ACG<br>CTG GTT TG         | CAA TAA AGA CCT<br>TCA CCT TCT GC         | 57°C |
| 11   | 121              | 289              | TGC TTT TCT CCT ATG<br>TGA CTC TG     | GGT GGG AGG ATC<br>ACT TGA CT             | 62°C |
| 12   | 85               | 209              | TGG TGT TAC CTC<br>ACA AAA GAC        | TGG AAA ATT ACA<br>GCT AAA GGC            | 56°C |
| 13   | 146              | 2016             | TCT AAA CAT TCT GTA<br>TCC TTG TG     | TTG TAA CTC TAG<br>AGG AAA GAG GTG        | 61°C |
| 14   | 101              | 198              | CCC CAT AAA TAT TCG<br>TTT AGG        | AAA TAT CTC TAA<br>TCA TGA GCT GAA C      | 57°C |
| 15   | 131              | 280              | GGT GGA ATG GAG<br>GCT TAG TG         | CAA TGG CTA TGA<br>AAA CAT TAT GTA<br>AAC | 61°C |
| 16   | 84               | 195              | GCA GAT ATT GAG<br>ATT TTC GGT TC     | GAA GCC AAT TTG<br>TTT TCA AAG AG         | 59°C |
| 17   | 120              | 253              | TTT TAA ACT TAG GAA<br>GTC CAG GG     | CAT TCA GTC ATA<br>GTC TGT AGG AGC        | 60°C |
| 18   | 203              | 393              | CTG GAG GAA ATG<br>CTT GGT TC         | GTT GCT GAA CAA<br>TTC CTA TGT G          | 59°C |
| 19   | 96               | 178              | TTT TAC CTT TGC TTT<br>AAA ACT CTC    | CAA CAA AAT CCC<br>ACA GAA G              | 56°C |
| 20   | 123              | 184              | TCA ACT CCT GTC CTT<br>CTG TG         | GCC TGG TAC CCA<br>GTA AAT AAA G          | 52°C |
| 21   | 118              | 257              | CTG GTA TAG GGT<br>TTT CAT ACT AAT C  | ATA ATT CTA GCA<br>GAA CTT AAA GCA<br>TTC | 56°C |

Exon lengths were determined using the Genome browser webpage ([https://genome.ucsc.edu/cgi-bin/hgTracks?db=hg19&lastVirtModeType=default&lastVirtModeExtraState=&virtModeType=default&virtMode=0&nonVirtPosition=&position=chr17%3A30469473%2D30552746&hgid=725100075\\_KGJ3cA6ASUEwBxgtEWZOdDHUrx2K](https://genome.ucsc.edu/cgi-bin/hgTracks?db=hg19&lastVirtModeType=default&lastVirtModeExtraState=&virtModeType=default&virtMode=0&nonVirtPosition=&position=chr17%3A30469473%2D30552746&hgid=725100075_KGJ3cA6ASUEwBxgtEWZOdDHUrx2K)).

Tm, annealing temperature of the primers.
